1                   **Computational Design and Analysis of**  
2                   **Modular Cells for Large Libraries of**  
3                   **Exchangeable Product Synthesis Modules**

4                   Sergio Garcia<sup>1,2</sup> and Cong T. Trinh<sup>1,2,\*</sup>

5                   <sup>1</sup>*Department of Chemical and Biomolecular Engineering, The University of*  
6                   *Tennessee, Knoxville, TN, United States*

7                   <sup>2</sup>*Center for Bioenergy Innovation, Oak Ridge National Laboratory Oak*  
8                   *Ridge, TN, United States*

9                   \* *Corresponding author: 1512 Middle Drive, DO432, Department of*  
10                   *Chemical and Biomolecular Engineering, University of Tennessee,*  
11                   *Knoxville, TN 37996, United States. Tel: 865-974-2181. Email:*  
12                   *ctrinh@utk.edu.*

## Abstract

Microbial metabolism can be harnessed to produce a large library of useful chemicals from renewable resources such as plant biomass. However, it is laborious and expensive to create microbial biocatalysts to produce each new product. To tackle this challenge, we have recently developed modular cell (ModCell) design principles that enable rapid generation of production strains by assembling a modular (chassis) cell with exchangeable production modules to achieve overproduction of target molecules. Previous computational ModCell design methods are limited to analyze small libraries of around 20 products. In this study, we developed a new computational method, named ModCell-HPC, capable of designing modular cells for large libraries with hundredths of products with a highly-parallel and multi-objective evolutionary algorithm. We demonstrated ModCell-HPC to design *Escherichia coli* modular cells towards a library of 161 endogenous production modules. From these simulations, we identified *E. coli* modular cells with few genetic manipulations that can produce dozens of molecules in a growth-coupled manner under different carbon sources. These designs revealed key genetic manipulations at the chassis and module levels to accomplish versatile modular cells. Furthermore, we used ModCell-HPC to identify design features that allow an existing modular cell to be re-purposed towards production of new molecules. Overall, ModCell-HPC is a useful tool towards more efficient and generalizable design of modular cells to help reduce research and development cost in biocatalysis.

**Keywords:** Modular cell design; Modular (chassis) cell; Production Modules; Compatibility; ModCell; ModCell-HPC; Multiobjective optimization; Multiobjective evolutionary algorithm; Master-slave parallelization; Island parallelization; High performance computing.

## 38 1 Introduction

39 Modular design has gained recent interest as an effective approach to understand and re-  
40 design cellular systems.<sup>1</sup> In the fields of metabolic engineering and synthetic biology, var-  
41 ious modularization strategies<sup>2-7</sup> have been proposed to address the slow and expensive  
42 design-build-test cycles of developing microbial catalysts for renewable chemical synthesis.<sup>8</sup>  
43 A promising system-level modularization<sup>9</sup> approach is ModCell,<sup>4</sup> that aims to design a mod-  
44 ular (chassis) cell compatible with exchangeable production modules that enable metabolite  
45 overproduction. ModCell could be used as an effective tool to design modular cells capable  
46 of efficiently producing a vast number of molecules offered by nature with minimal strain  
47 optimization requirements,<sup>10,11</sup> but it remains unexplored for large product libraries.

48 Previous efforts in computational modular cell design are limited to analyze small libraries  
49 of around 20 products.<sup>4,6</sup> However, the design of modular cells for larger product libraries  
50 is both of practical and theoretical interest. Theoretically, using large libraries can lead to  
51 more general modular cell design rules, which might help to explain the naturally existing  
52 modularity of metabolic networks.<sup>1</sup> Practically, such modular cells could be implemented  
53 with genetic engineering techniques that enable rapid pathway generation, such as combina-  
54 torial ester pathways,<sup>12</sup> and where the modular cell could serve as a versatile platform for  
55 pathway selection and optimization using adaptive laboratory evolution.<sup>13</sup>

56 Modular cell design was formulated as a multi-objective optimization problem (MOP),  
57 named ModCell2, where each target phenotype activated by a module is an independent ob-  
58 jective.<sup>4</sup> ModCell2 was solved with multi-objective evolutionary algorithms (MOEAs) that  
59 used a master-slave parallelization scheme, where the objective functions are evaluated in  
60 parallel by slave processes, but every other step in the algorithm is performed serially (Fig-  
61 ure 1 a).<sup>4,5</sup> This approach contains many serial steps, and hence limits the scalability of  
62 the algorithm with the number processes according to Ahmdal's law.<sup>14</sup> In particular, large  
63 population sizes, an effective strategy to deal with many objectives,<sup>5,15</sup> can dramatically slow  
64 down serial algorithm operations such as non-dominated sorting in NSGA-II,<sup>16</sup> one of the

65 best performing MOEAs to solve ModCell2.<sup>5</sup> Furthermore, increasing the product library size  
66 for ModCell leads to very large multi-objective optimization problems, which are notoriously  
67 difficult to solve.<sup>17,18</sup> Therefore, the master-slave approach used in ModCell2 is not suitable  
68 to analyze large problems that contain hundredths of exchangeable production modules. A  
69 new parallelization approach that uses high-performance computing (HPC) more effectively  
70 is needed to advance ModCell.

71 In recent years, multiple approaches to harness HPC have been developed to solve single-  
72 objective evolutionary algorithms (EA).<sup>19</sup> In particular, the island-parallelization approach  
73 has been proposed, where multiple instances of the EA are run independently but communi-  
74 cate with each other to enhance overall convergence towards optimal solutions (Figure 1 b).  
75 This new approach helps address the serial bottlenecks of the master-slave approach by sep-  
76 arating the algorithm into highly independent processes that directly map to the computing  
77 hardware. While this approach has not been thoroughly examined in MOEA, there are a few  
78 successful applications to specific design problems.<sup>20–22</sup>

79 In this study, we developed ModCell-HPC, a highly parallel MOEA that uses the island  
80 parallelization approach to solve modular cell design problems with hundredths of objectives.  
81 We demonstrated ModCell-HPC to design *Escherichia coli* modular cells with a large pro-  
82 duction module library of metabolically and biochemically diverse endogenous compounds.  
83 Analysis of these designs revealed key genetic manipulations both at the chassis and module  
84 levels required for highly compatible modular cells. Furthermore, we designed modular cells  
85 for conversion of various hexoses and pentoses, since these sugars are the main components  
86 of biomass feedstocks.<sup>23</sup> Finally, we used ModCell-HPC to identify the features of a modular  
87 cell that makes it compatible towards new production modules.

## 88 2 Methods

### 89 2.1 Multi-objective optimization formulation of modular cell de- 90 sign problem

The modular (chassis) cell is built in a top-down manner by removing metabolic functions from a parent strain, and then inserting exchangeable modules into the chassis to create production strains that optimally display the target phenotypes. Due to the conflicting biochemical and metabolic requirements of different product synthesis pathways, the modular cell design problem is formulated as the following MOP known as ModCell2:<sup>4</sup>

$$\max_{y_j, z_{jk}} (f_1, f_2, \dots, f_{|\mathcal{K}|})^T \quad \text{s.t.} \quad (1)$$

$$f_k \in \arg \max \left\{ \frac{1}{f_k^{max}} \sum_{j \in \mathcal{J}_k} c_{jk} v_{jk} \quad \text{s.t.} \right. \quad (2)$$

$$\left. \sum_{j \in \mathcal{J}_k} S_{ijk} v_{jk} = 0 \quad \text{for all } i \in \mathcal{I}_k \right. \quad (3)$$

$$l_{jk} \leq v_{jk} \leq u_{jk} \quad \text{for all } j \in \mathcal{J}_k \quad (4)$$

$$l_{jk} d_{jk} \leq v_{jk} \leq u_{jk} d_{jk} \quad \text{for all } j \in \mathcal{C} \quad (5)$$

$$\left. d_{jk} = y_j \vee z_{jk} \right\} \quad \text{for all } k \in \mathcal{K} \quad (6)$$

$$z_{jk} \leq (1 - y_j) \quad \text{for all } j \in \mathcal{C}, k \in \mathcal{K} \quad (7)$$

$$\sum_{j \in \mathcal{C}} z_{jk} \leq \beta \quad \text{for all } k \in \mathcal{K} \quad (8)$$

$$\sum_{j \in \mathcal{C}} (1 - y_j) \leq \alpha \quad (9)$$

91 This MOP simultaneously maximizes all objectives  $f_k$  (1), where  $k$  belongs to the set of  
92 production networks  $\mathcal{K}$ . Each production network represents the combination of the chassis  
93 with a specific production module, and it is simulated through a stoichiometric model<sup>24</sup> (2-6)  
94 with a set of metabolites  $\mathcal{I}_k$  and a set of reactions  $\mathcal{J}_k$ . The stoichiometric model predicts

95 metabolic fluxes according to the following constraints: (i) mass-balance (3), where  $S_{ijk}$   
96 represents the stoichiometric coefficient of metabolite  $i$  in reaction  $j$  of production network  
97  $k$ , (ii) flux bounds (4) that determine reaction reversibility and available substrates, where  
98  $l_{jk}$  and  $u_{jk}$  are lower and upper bounds respectively, and (iii) genetic manipulation (5), i.e.,  
99 deletion of a reaction  $j$  in the chassis through the binary indicator  $y_j$ , or insertion of a  
100 reaction  $j$  in a specific production network  $k$  through the binary indicator  $z_{jk}$ . Only a subset  
101 of all metabolic reactions,  $\mathcal{C}$ , are considered as candidates for deletion, since many of the  
102 reactions in the metabolic model cannot be manipulated to enhance the target phenotype.

103 The desirable phenotype  $f_k$  for production module  $k$  is determined based on key metabolic  
104 fluxes  $v_{jk}$  (mmol/gDCW/h) predicted by the model (2-5). For this study, we selected the  
105 weak growth coupled to product formation (*wGCP*) design objective that requires a high  
106 minimum product synthesis rate at the maximum growth rate, enabling growth selection of  
107 optimal production strains. Hence, in *wGCP* design, the inner optimization problem seeks  
108 to maximize growth rate while calculating the minimum product synthesis rate through the  
109 linear objective function (2). Here  $c_{jk}$  is 1 and  $-0.0001$  for  $j$  corresponding to the biomass  
110 and product reactions across all networks  $k$ , respectively, and 0 otherwise. In general, the  
111 definition of  $f_k$  needs not be linear and other design phenotypes can be defined.<sup>4</sup>

112 Finally, design constraints (7-9) define the limitations of the design variables representing  
113 genetic manipulations,  $y_j$  and  $z_{jk}$ . As part of modular cell design, reactions can be removed  
114 from the chassis but inserted back to specific production modules, enabling the chassis to be  
115 compatible with a broader number of modules (7). The total numbers of module reaction  
116 additions and reaction deletions in the chassis are limited by parameters  $\beta$  (8) and  $\alpha$  (9),  
117 respectively.

To define the solutions of ModCell2 (1-9), the general multi-objective optimization prob-  
lem with design variables  $x$  from a set  $\mathcal{X}$  and objective functions  $f_i(x)$  is expressed as follows:

$$\max_x F(x) = (f_1(x), f_2(x), \dots)^T \forall x \in \mathcal{X}$$

The solution of such an optimization problem is denoted as a Pareto set:

$$\mathcal{PS} := \{x \in \mathcal{X} : \nexists x' \in \mathcal{X}, F(x') \prec F(x)\}$$

Here  $F(x') \prec F(x)$  indicates that the objective vector  $F(x')$  *dominates*  $F(x)$ , defined as  $f_i(x') \geq f_i(x)$  for all objectives  $i$ , and  $f_i(x') \neq f_i(x)$  for at least one  $i$ . Hence, the Pareto set contains all non-dominated solutions to the optimization problem; that is, when comparing any two non-dominated solutions, the value of a certain objective must be diminished in order to increase the value of a different objective. The projection of the Pareto set on the objective space is denoted as a Pareto front:

$$\mathcal{PF} := \{F(x) : x \in \mathcal{PS}\}$$

## 118 2.2 Implementation of many-objective evolutionary algorithm with 119 high-performance computing

120 To overcome the issues of the master-slave approach (Figure 1 a) used in ModCell2,<sup>4</sup> we  
121 implemented an island parallelization scheme,<sup>19</sup> where each computing process is an instance  
122 of the MOEA (Figure 1 b). These instances exchange individuals (i.e., potential solutions) in  
123 a process called migration, hence enhancing overall convergence towards optimal solutions  
124 (Figure 1 c). The migration operation can be performed in different modes, depending  
125 on which individuals from the local population are exchanged, and also how often such  
126 exchanges happen. These options are captured by the migration type and migration interval  
127 parameters, respectively (Table 1). To enhance performance and scalability, the migration  
128 process was implemented asynchronously, i.e., the population within each island can continue  
129 to evolve without a need to wait for sent individuals to arrive at their destination island or  
130 for incoming individuals to be received.

131 To improve the quality of the MOEA solutions, we implemented two post-processing steps

132 specific to ModCell (Figure S1): First, we eliminate *futile module reactions*. These module  
133 reactions once removed do not diminish the objective value of the associated production  
134 network. Second, we coalesce multiple designs with the same deletions but different module  
135 reactions. This combination helps obtain a superior solution.

136 The software implementation of the proposed island-MOEA, denoted *ModCell-HPC*, is  
137 written in the C programming language and available at [https://github.com/TrinhLab/  
138 modcell-hpc](https://github.com/TrinhLab/modcell-hpc).

## 139 **2.3 Computation hardware**

140 We conducted all ModCell-HPC computations in *beacon* nodes from the Advanced Comput-  
141 ing Facility at the Joint Institute for Computational Science, The University of Tennessee  
142 and Oak Ridge National Laboratory. Each node contains a 16 core Intel Xeon E5-2670 cen-  
143 tral processing unit (CPU) and 256 GB of random access memory (RAM). The results were  
144 analyzed in a desktop computer with an Intel Core i7-3770 CPU and 32 GB of RAM.

## 145 **2.4 Target product identification**

146 The target products are endogenous *E. coli* metabolites that meet the following requirements:  
147 i) their maximum theoretical yields are above 0.1 (mol product/mol of substrate); ii) they  
148 are organic; and iii) they could be produced anaerobically in a growth coupled manner with  
149 a yield above 50%, a property determined in a previous study.<sup>25</sup> If a given metabolite meets  
150 all these conditions but appears in multiple compartments, only one location is chosen.  
151 Implementation of these selection criteria resulted in 161 target metabolites. Metabolites  
152 that did not have a secretion mechanism originally present in the model required an exchange  
153 pseudo-reaction that represents metabolite secretion to the growth medium or intracellular  
154 accumulation at steady-state. The products in the selected library have diverse molecular  
155 weights and are overall highly reduced (Figure S2).



## 156 **2.5 Model configuration**

157 We used the iML1515 *E. coli* model<sup>26</sup> for all simulations. To configure the model, glucose  
158 uptake was set to 15 (mmol/gCDW/h); the default ATP maintenance value in iML1515 was  
159 used; 20% of the maximum anaerobic growth rate was used as the minimum growth rate,  
160 corresponding to 0.0532 (1/h); and only commonly observed fermentation products were  
161 allowed for secretion. This model configuration is equivalent to the previous modular cell  
162 design studies<sup>4</sup> except for the higher glucose uptake rate. This rate was increased to match  
163 the study of Kamp and Klamt<sup>25</sup> which was partially used here to identify target products.

## 164 **2.6 Design characterization**

### 165 **2.6.1 Compatibility**

166 An important qualitative feature of a designed modular (chassis) cell is module compatibility.  
167 The chassis is *compatible* with a module if the performance of the resulting production strain  
168 is above a defined threshold of design objective value. In this study, we used the *wGCP* design  
169 objective that corresponds to the minimum product yield at the maximum growth rate,<sup>4</sup> and  
170 selected a threshold of 0.5 to establish compatibility. Under these conditions, we expect a  
171 module compatible with the chassis can lead to a product yield above 50% of the theoretical  
172 maximum during the growth phase. The *compatibility* of a modular cell is defined as the  
173 number of modules that are compatible with it.

### 174 **2.6.2 Minimal covers**

175 A *minimal cover* is the smallest group of modular cells needed to ensure all potentially  
176 compatible products in a library are compatible with at least one of the modular cells.  
177 To identify minimal (set) covers computationally, we use the classical integer programming  
178 formulation:

$$\min_{x_h \in \{0,1\}} \sum_{h \in \mathcal{H}} (\gamma_h x_h) \quad (10)$$

subject to:

$$\sum_{h \in \mathcal{H}} a_{hk} x_h \geq 1 \quad \forall k \in \mathcal{K}' \quad (11)$$

179 This optimization problem minimizes the number of designs in the set cover, where  $\mathcal{H}$  is  
180 the set of strain designs,  $h$ , produced by ModCell-HPC (10). The binary indicator variable  
181  $x_h$  takes a value of 1 if design  $h$  is selected as part of the set cover and 0 otherwise. Certain  
182 designs can be prioritized (e.g., they contain preferable genetic manipulations) using the  
183 weighting parameter  $\gamma_h$ . However, we set  $\gamma_h = 1$  in all our simulations. All compatible  
184 products  $k$  must be included in at least one of the selected designs (11). The parameter  $a_{hk}$   
185 takes a value of 1 if product  $k$  is compatible with design  $h$  and 0 otherwise. There must exist  
186 at least one  $h \in \mathcal{H}$  for which  $a_{hk} = 1$  to ensure a feasible solution exists; therefore,  $\mathcal{K}'$  is the  
187 subset of products compatible in at least one design of  $\mathcal{H}$ .

To enumerate all minimal covers, we iteratively solved the minimal cover problem (10-11) with the addition, in each iteration, of an integer cut inequality (12) that removes a previously found solution  $\mathcal{S}$ .

$$\sum_{h \in \mathcal{S}} x_h \leq |\mathcal{S}| - 1 \quad (12)$$

## 188 2.7 Coverage performance indicator

Algorithm performance is tested against several parameter configurations, each producing a Pareto front approximation ( $\mathcal{PF}$ ). All resulting Pareto fronts are gathered into a reference Pareto front ( $\mathcal{PF}^*$ ). Coverage,  $C$ , is defined as the fraction of solutions in  $\mathcal{PF}^*$  captured by a given approximation  $\mathcal{PF}$ :

$$C = \frac{|\mathcal{PF} \cap \mathcal{PF}^*|}{|\mathcal{PF}^*|} \quad (13)$$

189 In our analysis, we only used unique non-dominated points in both  $\mathcal{PF}$  and  $\mathcal{PF}^*$  to avoid  
190 many alternative solutions from biasing the coverage indicator.

## 191 **3 Results**

### 192 **3.1 Tuning of ModCell-HPC method parameters**

193 A known challenge of heuristic optimization approaches is their reliance on parameter tun-  
194 ing for rapid convergence towards optimal solutions. To identify sensible default parameters  
195 for ModCell-HPC, we first scanned parameter combinations with a previous 20-objectives  
196 problem<sup>4</sup> that is fast to solve, then focused on the most relevant parameters for a large-scale  
197 problem with 161 objectives corresponding to the current product library. In both cases,  
198 we used two performance metrics to identify the best algorithm parameters: i) *Coverage*,  
199 that indicates the fraction of Pareto optimal solutions identified by a given parameter con-  
200 figuration (Section 2.7). ii) *minimal cover size*, i.e., the smallest number of modular cells  
201 needed to ensure all compatible products in the library that are compatible in at least one  
202 (Section 2.6.2). Coverage is a general and unbiased quantitative measure which is preferred  
203 over other similar metrics based on a previous study,<sup>5</sup> while minimal cover size is based on  
204 practical goals.

205 In our initial benchmark study with the 20-objectives problem, we screened different to-  
206 tal run times, migration interval, migration types, and population sizes (Table 1) for best  
207 achieving modular cell designs. The design parameters were set to  $\alpha = 6$  and  $\beta = 1$ , which  
208 are sufficient to find highly compatible designs.<sup>6</sup> For 1-hour run time, we observed the small-  
209 est population size (100) reached more generations (Figure S3 e,f) and hence achieved better  
210 results in both metrics (Figure S3 a,b). However, for a 2-hours run time, both population  
211 sizes of 100 and 500 attained similar cover sizes (Figure S3 g), indicating that a minimum of  
212 approximately 150 generations (Figure S3 e,f,k,l) is necessary for convergence of this prob-  
213 lem, irrespective of the population size. Taken together, the different performance between

214 100 and 500 population sizes in relation to run time indicates that under limited run times  
215 an optimal population size could be found to attain sufficient generations for convergence.  
216 The migration interval only appeared detrimental at the highest value of 50 with the smallest  
217 population size of 100 at 1 hour (Figure S3 a,b,g,h); otherwise this parameter was consid-  
218 ered secondary, and hence an intermediate value of 25 was selected for further simulations.  
219 Similarly, migration policy also appeared to be a secondary parameter; nonetheless, the “Re-  
220 placeBottom” migration policy was selected for further simulations since it is better or equal  
221 to the “Random” policy in all cases (Figure S3 c,d,i,j).

222 For the large-scale benchmark with 161 products, we investigated the importance of run  
223 time, population size, and the number of computational cores (Table 1). For this benchmark,  
224 the design parameters were set to  $\alpha = 10$  and  $\beta = 2$  to enable successful designs without  
225 a large number of genetic modifications that can lead to unrealistic model predictions and  
226 implementation requirements. We evaluated 5 and 10 hour run times. For 5-hours run  
227 time, a population size of 200 was better in all metrics (Figure 2 a,b,c,e,f,g) and reached  
228 50-100 generations (Figure 2 d). For a 10-hours run time, the population sizes of 200 and  
229 300 had equivalent performance (Figure 2 e-g), despite the population size of 200 reaching  
230 approximately 50 generations more than the 300 population size. The population size of  
231 100 underperformed at both run-times (Figure 2 a,b,e,f). Taken together, this large-scale  
232 benchmark study indicates that after a given number of generations, larger population sizes  
233 are comparable as long as they are above a minimum size. Hence, a population size of 200 is  
234 the minimum required for proper convergence and should be used under limited run times.  
235 Increasing the number of cores leads to more solutions (Figure 2 c,g), due to a larger meta-  
236 population (the total population of all islands). However, additional cores do not necessary  
237 find better solutions in terms of minimal cover size and individual product compatibility  
238 (Figure 2 b,f). These indicators plateaued at around 48 cores in both cases so this value was  
239 used for further simulations. Alternative communication topologies among islands<sup>27</sup> may  
240 provide better scaling with cores but were not explored here.

241 In summary, the benchmark performed here aims to provide a general guideline to use the  
242 ModCell-HPC. Furthermore, this parameter meta-optimization procedure can be repeated  
243 to fine-tune the algorithm to specific problem features (e.g., number of objectives) and  
244 computational resources available (e.g., run time and computing cores).

## 245 **3.2 Design of *E. coli* modular cells for large product library**

246 **A small number of genetic manipulations are sufficient for highly compatible**  
247 **modular cell** After tuning ModCell-HPC, we used it to design *E. coli* modular cells for our  
248 library of 161 products. First, we scanned a broad range of design parameter combinations  
249 ( $\alpha$ - $\beta$ : 5-1, 10-2, 20-4, and 40-8) to identify the required genetic manipulations for highly  
250 compatible designs (Figure S4 a). Increasing the number of genetic manipulations led to  
251 an average increase in design compatibility. However, the maximum compatibility remained  
252 around 50% of the library (80 products) for all cases. This result indicates that highly  
253 compatible modular cells can be built with a small number of genetic manipulations. We  
254 selected the designs with  $\alpha = 5$ ,  $\beta = 1$  (Supplementary Material 2) for further analysis,  
255 since designs with few genetic manipulations are more accurately simulated and also better  
256 to implement in practice.

257 **A few reaction deletions in central metabolism targeting byproducts and branch-**  
258 **points are key to build modular cells** We sorted reaction deletions according to how  
259 often they appear across designs (Table 2). The top 7 reactions are used  $\geq 10\%$  of the de-  
260 signs and belong to central metabolism, indicating their importance to accomplish growth-  
261 coupled-to-product-formation phenotypes. Overall, the role of these deletions can be classi-  
262 fied into two functions: i) to eliminate major byproducts and ii) to alter key branch-points  
263 in metabolism that influence the pools of precursor metabolites, including carbon, redox,  
264 and energy precursors. The first type of manipulations is generally intuitive and often used  
265 in metabolic engineering strategies.<sup>28</sup> The second type of manipulations are not commonly

266 identified unless metabolic model simulations are used,<sup>29–31</sup> even though the importance of  
267 targeting metabolic branch-points was noted early.<sup>32</sup> An example of this second type observed  
268 in our designs is TPI deletion, that activates the methylglyoxal bypass,<sup>33</sup> reducing the overall  
269 ATP yield resulting from glucose conversion into pyruvate. Lower ATP yield limits biomass  
270 formation hence redirecting carbon flow towards products of interest. While such strategies  
271 are not common, TPI deletion predicted by model simulations was successfully used for en-  
272 hanced 3-hydroxypropionic acid production,<sup>29</sup> and ATP wasting has recently been proposed  
273 to enhance production of certain molecules.<sup>34</sup> Another example of branch-point manipulation  
274 is PPC deletion, that has been shown to lower flux from lower glycolysis towards the TCA  
275 cycle,<sup>35,36</sup> resulting in lower succinate production, and an increased pool of *pep*, pyruvate  
276 and acetyl-CoA. Additionally, PPC deletion to increase the *nadph* pool for production of  
277 flavonoids was predicted by model simulation and experimentally validated.<sup>31</sup> In summary,  
278 design of highly compatible modular cells requires not only major byproduct removal, but  
279 also manipulation of key branch points in central metabolism.

## 280 **Module reaction usage reveals pathway interfaces and unbiased module definition**

281 The modular cell optimization formulation (Section 2.1) not only identifies genetic manipu-  
282 lations in the modular cell, but also in the production modules. Module reactions correspond  
283 to reactions deleted in the chassis but inserted back in specific production modules to enable  
284 compatibility. We examined the module reactions used by all designs (Figure 3). As ex-  
285 pected, ALCD2x, ACKr, and LDH\_D, are used by ethanol, acetate, and lactate production  
286 networks, respectively. More notably, we also observed several reaction modules are used for  
287 specific products, for example, MDH and FUM 3-methyl-2-oxobutanotae and 2,3-dihydroxy-  
288 3-methylbutanoate, resepectively, that are naturally precursors of valine and artificially of  
289 isobutanol<sup>37,38</sup>. These module reactions likely play a role in both the synthesis of relevant  
290 TCA precursors and the secretion of succinate as an electron sink. Interestingly, fatty acids  
291 tend to use TPI, which as mentioned earlier, its deletion activates the methylglyoxal bypass

292 lowering the overall ATP yield. The first step in fatty acid biosynthesis, acetyl-CoA carboxy-  
293 lase, requires one ATP per mol of malonyl-CoA, explaining the usage of TPI as a module  
294 reaction for this family of products. Overall, module reactions enhance the compatibility  
295 of a modular cell, leading to more efficient strategies and revealing potential metabolic flux  
296 bottlenecks that are not always directly upstream of the target product.

### 297 **Three modular cells is the smallest set needed to cover all compatible products**

298 We next aimed to identify the smallest set of modular cells that include all compatible prod-  
299 ucts in the library (Section 2.6.2). For the Pareto set of designs  $\alpha = 5$ ,  $\beta = 1$ , we enumerated  
300 a total of 12 minimal covers of size 3. These covers are spanned by combinations of 8 unique  
301 designs (Figure S5). We selected the cover k that contains designs 82, 121, and 124, which  
302 use few deletions and have similar genetic manipulations among them. All designs in this  
303 cover have in common the deletion of ALCD2x and LDH\_D, disabling production of ethanol  
304 and lactate, the major reduced products of anaerobic growth in *E. coli*. Designs 121 and  
305 124 have 57 compatible products in common, while design 121 is uniquely compatible with  
306 ethanol, formate, and 2,3-dihydroxymethylbutanoate, and design 124 is uniquely compatible  
307 with succinate (Figure 4 a). These two designs only differ in that design 121 uses FUM  
308 deletion while design 124 uses MDH deletion (Figure 4 b). Different from designs 121 and  
309 124, design 82 is the only design that features the deletion of FLDR2 and PPC and is  
310 uniquely compatible with 24 modules, all for fatty acids synthesis. FLDR2 is coupled with  
311 POR5 to form a pathway for the reduction of pyruvate into acetyl-CoA consuming *nadph*  
312 (Figure 4 c), a key redox cofactor in fatty acid biosynthesis. PPC deletion is a metabolic  
313 engineering strategy to increase *nadph* available that has been experimentally validated.<sup>31</sup>  
314 Overall, these designs can be efficiently built due to their similarity, and are mainly composed  
315 of strategies that have been demonstrated in isolation and cover large product families.

### 316 **3.3 Design of *E. coli* modular cells for conversion of hexoses and** 317 **pentoses**

318 **Non-glucose carbon sources require more genetic manipulations for high compat-**  
319 **ibility designs** We designed modular cells to consume other relevant fermentable sugars  
320 besides glucose also present in biomass feedstocks, including pentoses (i.e., xylose and arabi-  
321 nose) and hexoses (i.e., galactose and mannose) (Figure 5 a). For this case study, everything  
322 remained the same except for the substrate uptake reaction in the model which was changed  
323 to reflect the sole carbon source in each case. We first scanned the distribution of design com-  
324 patibilities resulting from various combinations of  $\alpha$  and  $\beta$  for each carbon source (Figure S4  
325 b-e). All cases plateaued at maximum compatibilities around 50%; however, galactose, ara-  
326 binose and xylose required at least  $\alpha = 10$ ,  $\beta = 2$  to reach this level, while glucose and  
327 mannose reached it with only  $\alpha = 5$ ,  $\beta = 1$ . Hence, we selected  $\alpha = 10$ ,  $\beta = 2$  for further  
328 analysis. Overall, this simulation reveals the possibility of highly compatible modular cells  
329 for various hexose and pentose carbon sources, at the expense of an increased number of  
330 genetic manipulations for some of the carbon sources.

331 **The effect of pentose uptake in redox metabolism leads to lower compatibility**  
332 **than hexoses** For the set of designs in each carbon source, we examined the total com-  
333 patible products, i.e., the number of unique products compatible in at least one design from  
334 the Pareto front. This analysis revealed a group of 26 products (27% of the total 96 compat-  
335 ible products and 16% of the original library size) that are only compatible in designs with  
336 hexose carbon sources (Figure 5 b). The incompatibility of these 26 products is likely due  
337 to the lower reduction potential and different uptake pathways of pentoses with respect to  
338 hexoses (Figure 5 a). More specifically, analysis of the most deleted reactions in each carbon  
339 source revealed several differences in deletions between pentoses and hexoses (Figure 5 c).  
340 Notably, pentoses do not use TKT2 and MDH reaction deletions, while hexoses make highly  
341 frequent use of them. TKT2 is a key component of incorporating pentoses into glycolysis,



342 and hence cannot be deleted by pentose consuming designs. MDH has been observed to be  
343 up-regulated under anaerobic conditions when the sole carbon source is pyruvate, galactose,  
344 or xylose with respect to glucose.<sup>39</sup> Hence, MDH could be an important source of *nadh* for  
345 substrates with less reduction potential. Alternatively, MDH could also be important for  
346 *nadph* generation as part of a pathway involving NADP-dependent malic enzyme (ME2)  
347 that converts malate to pyruvate and generates one mol of *nadph*. Overall, pentose uptake  
348 does not use the oxidative branch of the pentose phosphate pathway, the most important  
349 source of *nadph* in *E. coli*,<sup>40</sup> hence limiting the products that can be growth-coupled to  
350 these carbon sources. Further study of the reactions that limit pentose compatibility could  
351 enable strategies to overcome it in certain cases (e.g., generation of alternative sources of  
352 *nadph*<sup>41,42</sup>).

### 353 **3.4 Compatibility towards modules unknown at the time of chas-** 354 **sis design**

355 **Highly compatible designs are better suited to be re-purposed towards unknown**  
356 **products.** To rapidly explore the large space of potential production modules, existing  
357 strains could be re-purposed for production of molecules not considered as part of the orig-  
358 inal design. To examine this scenario, we randomly partitioned the product library into  
359 two evenly sized groups, and independently used each partition as input for ModCell-HPC.  
360 This was done in triplicates, each corresponding correspond to a different random product  
361 partition. Hence, in each replicate there is a group of known products at the time of design  
362 and a group of unknown products. For the designs produced by ModCell-HPC, we computed  
363 their objective value and then compatibility towards unknown products, which we refer to as  
364 *unknown compatibility* of a design, a useful metric to understand the potential to re-purpose  
365 a given design. In contrast, *known compatibility* is the compatibility towards known prod-  
366 ucts at the time of design, simply referred to as compatibility in previous cases study. The  
367 analysis of unknown compatibility of a new production module with an existing modular

368 cell design is similar to the concept of degree of coupling that was previously introduced in  
369 MODCELL based on a different computation framework.<sup>3</sup> The total number of designs for  
370 each product group and the unknown compatibility distributions noticeably changed across  
371 replicates (Figure 6 a). This result reveals the important effect of known products in the  
372 resulting designs, which could be further explored to identify “representative products” that  
373 can capture the necessary metabolic phenotypes required for certain product families. Re-  
374 markably, there was a high correlation between known and unknown compatibility of a given  
375 design (Figure 6 b-d). Hence, highly compatible designs are better suited to be re-purposed  
376 towards unknown products.

**Deletion reactions that remove major fermentation byproducts and alter redox metabolism have the highest contribution towards unknown compatibility**

To identify the specific genetic intervention strategies that contribute to the unknown compatibility of a design, we defined the unknown compatibility contribution of deletion reaction  $j$  ( $ucc_j$ ) as follows:

$$ucc_j = \frac{\sum_{h \in \mathcal{H}_j} u_h}{|\mathcal{H}|} \quad (14)$$

377 where  $\mathcal{H}_j$  is the subset of designs from a ModCell-HPC solution (Pareto set  $\mathcal{H}$ ) containing  
378 deletion reaction  $j$ , and  $u_h$  is the unknown compatibility of design  $h$ . We computed  $ucc$  for  
379 all 3 replicates and examined the top 10 sorted by mean value (Table 3). The main contribu-  
380 tors towards unknown compatibility were removal of major fermentative byproducts (lac-  
381 tate, ethanol, and acetate) followed by manipulation of redox pathways (THD2pp, FLDR2,  
382 MDH) and metabolic branch points (TKT2, PPC). Indeed byproduct removal strategies are  
383 the most common across the metabolic engineering literature.<sup>28</sup> Strain re-purposing could  
384 be further explored with algorithms specialized for this task, e.g., by identifying module  
385 reactions in the unknown modules or using the existing strain as a starting point to iden-  
386 tify genetic manipulations instead of a wild-type strain. In our analysis, we have identified  
387 that high modular cell compatibility and certain reaction deletions are positive indicators of

388 compatibility towards unknown products.

## 389 4 Conclusions

390 In this study, we developed ModCell-HPC, a computational method to design modular cells  
391 compatible with hundredths of product synthesis modules. We applied ModCell-HPC to  
392 design *E. coli* modular cells with a product library of 161 endogenous metabolites. This  
393 resulted in many Pareto optimal designs for the production of these molecules, from which  
394 we identified three modular cells that include all compatible products. The designs feature  
395 strategies consistent with previous experimental studies aimed at optimizing production of  
396 a single product, reinforcing our confidence in the value of our simulations. Remarkably,  
397 the strategies not only include removal of major byproducts, but also modification of key  
398 metabolic branch-points. The modular cells were designed for growth-coupled production,  
399 which not only is expected to result in high product yields but also enables high-throughput  
400 pathway engineering approaches. Specifically, the modular cell can be simultaneously trans-  
401 formed with a module library to rapidly identify good candidates through adaptive laboratory  
402 evolution.<sup>13,43</sup> We also used ModCell-HPC to design modular cells that utilize different hex-  
403 oses and pentoses carbon sources. This revealed the limitations of pentoses towards coupling  
404 with certain products which might be addressed by redox cofactor engineering. Finally, we  
405 identified that high compatibility and certain reaction deletion are important features to  
406 re-purpose an existing modular cell towards new modules. Overall, ModCell-HPC is an ef-  
407 fective tool towards more efficient and generalizable design of modular cells and platform  
408 strains that have recently captured the interest of metabolic engineers.<sup>8</sup>

## 409 Acknowledgement

410 This research was supported by the NSF CAREER award (NSF1553250), the DOE BER  
411 Genomic Science Program (DE-SC0019412), and the Center of Bioenergy Innovation (CBI),

412 U.S. Department of Energy Bioenergy Research Center supported by the Office of Biological  
413 and Environmental Research in the DOE Office of Science. The funders had no role in  
414 the study design, data collection and analysis, decision to publish, or preparation of the  
415 manuscript.

## 416 Tables

Table 1: Island-MOEA parameters evaluated in ModCell-HPC.

| Name               | Description                                                                                                                                                                                                        |
|--------------------|--------------------------------------------------------------------------------------------------------------------------------------------------------------------------------------------------------------------|
| Population size    | Number of individuals per island.                                                                                                                                                                                  |
| Migration type     | “ReplaceBottom”: After non-dominated sorting of the Pareto front <sup>16</sup> (survivor selection), top individuals are sent and bottom individuals replaced. “Random”: Random individuals are sent and replaced. |
| Migration interval | Number of generations between migration events.                                                                                                                                                                    |
| Run time           | Wall-clock time for which the MOEA runs. It determines the total number of generations.                                                                                                                            |
| Cores              | Each island is a computing core at the hardware level.                                                                                                                                                             |

Table 2: Top 20 reaction deletions for design parameters  $\alpha = 5$ ,  $\beta = 1$  with 162 designs. Counts indicate the percentage of designs where the deletion is used. All reaction and metabolite abbreviations used in this study correspond to BiGG identifiers (<http://bigg.ucsd.edu>).

| ID     | Name                                                | Formula                                                                          | Counts (%) |
|--------|-----------------------------------------------------|----------------------------------------------------------------------------------|------------|
| ALCD2x | Alcohol dehydrogenase (ethanol)                     | etoh_c + nad_c $\leftrightarrow$ acald_c + h_c + nadh_c                          | 57.4       |
| TPI    | Triose-phosphate isomerase                          | dhap_c $\leftrightarrow$ g3p_c                                                   | 45.1       |
| ACALD  | Acetaldehyde dehydrogenase (acetylating)            | acald_c + coa_c + nad_c $\leftrightarrow$ accoa_c + h_c + nadh_c                 | 40.7       |
| FLDR2  | Flavodoxin reductase (NADPH)                        | 2.0 flxso_c + nadph_c $\rightarrow$ 2.0 flxr_c + h_c + nadp_c                    | 24.1       |
| PPC    | Phosphoenolpyruvate carboxylase                     | co2_c + h2o_c + pep_c $\rightarrow$ h_c + oaa_c + pi_c                           | 21.6       |
| TKT2   | Transketolase                                       | e4p_c + xu5p_D_c $\leftrightarrow$ f6p_c + g3p_c                                 | 15.4       |
| LDH_D  | D-lactate dehydrogenase                             | lac_D_c + nad_c $\leftrightarrow$ h_c + nadh_c + pyr_c                           | 13         |
| G3PD2  | Glycerol-3-phosphate dehydrogenase (NADP)           | glyc3p_c + nadp_c $\leftrightarrow$ dhap_c + h_c + nadph_c                       | 7.4        |
| POR5   | Pyruvate synthase                                   | coa_c + 2.0 flxso_c + pyr_c $\leftrightarrow$ accoa_c + co2_c + 2.0 flxr_c + h_c | 7.4        |
| ACKr   | Acetate kinase                                      | ac_c + atp_c $\leftrightarrow$ actp_c + adp_c                                    | 6.8        |
| THD2pp | NAD(P) transhydrogenase (periplasm)                 | 2.0 h_p + nadh_c + nadp_c $\rightarrow$ 2.0 h_c + nad_c + nadph_c                | 6.2        |
| GLUDy  | Glutamate dehydrogenase (NADP)                      | glu_L_c + h2o_c + nadp_c $\leftrightarrow$ akg_c + h_c + nadph_c + nh4_c         | 5.6        |
| ASPT   | L-aspartase                                         | asp_L_c $\rightarrow$ fum_c + nh4_c                                              | 5.6        |
| ASNS2  | Asparagine synthetase                               | asp_L_c + atp_c + nh4_c $\rightarrow$ amp_c + asn_L_c + h_c + ppi_c              | 4.9        |
| CBMKr  | Carbamate kinase                                    | atp_c + co2_c + nh4_c $\leftrightarrow$ adp_c + cbp_c + 2.0 h_c                  | 4.3        |
| RNDR4  | Ribonucleoside-diphosphate reductase (UDP)          | trdrd_c + udp_c $\rightarrow$ dudp_c + h2o_c + trdox_c                           | 3.7        |
| RPE    | Ribulose 5-phosphate 3-epimerase                    | ru5p_D_c $\leftrightarrow$ xu5p_D_c                                              | 3.1        |
| SERD_L | L-serine deaminase                                  | ser_L_c $\rightarrow$ nh4_c + pyr_c                                              | 3.1        |
| LCARS  | Lactaldehyde reductase (S-propane-1,2-diol forming) | h_c + lald_L_c + nadh_c $\leftrightarrow$ 12ppd_S_c + nad_c                      | 2.5        |
| FUM    | Fumarase                                            | fum_c + h2o_c $\leftrightarrow$ mal_L_c                                          | 2.5        |

Table 3: Top 10 reactions sorted by mean unknown compatibility contribution (*ucc*) among replicates (i.e., R.1, R.2, and R.3).

| ID     | Name                                     | <i>ucc</i> |      |      |      |
|--------|------------------------------------------|------------|------|------|------|
|        |                                          | R. 1       | R. 2 | R. 3 | Mean |
| LDH_D  | D-lactate dehydrogenase                  | 13.2       | 10.5 | 11.9 | 11.9 |
| ALCD2x | Alcohol dehydrogenase (ethanol)          | 11.5       | 10.5 | 11.8 | 11.3 |
| PTAr   | Phosphotransacetylase                    | 4.0        | 4.8  | 6.5  | 5.1  |
| ACALD  | Acetaldehyde dehydrogenase (acetylating) | 4.5        | 2.8  | 2.9  | 3.4  |
| THD2pp | NAD(P) transhydrogenase (periplasm)      | 4.7        | 2.4  | 2.2  | 3.1  |
| ACKr   | Acetate kinase                           | 3.8        | 2.2  | 1.7  | 2.6  |
| FLDR2  | Flavodoxin reductase (NADPH)             | 2.0        | 2.2  | 2.9  | 2.4  |
| TKT2   | Transketolase                            | 2.6        | 2.0  | 2.5  | 2.4  |
| PPC    | Phosphoenolpyruvate carboxylase          | 2.3        | 2.2  | 2.5  | 2.3  |
| MDH    | Malate dehydrogenase                     | 2.7        | 1.1  | 2.3  | 2.0  |

## 417 Figures

Figure 1: Parallelization schemes for multi-objective evolutionary algorithms. (a) Master-slave approach used in the original ModCell2 implementation. (b) Island parallelization following ring topology implemented in ModCell-HPC. (c) Key steps in the evolutionary algorithm.

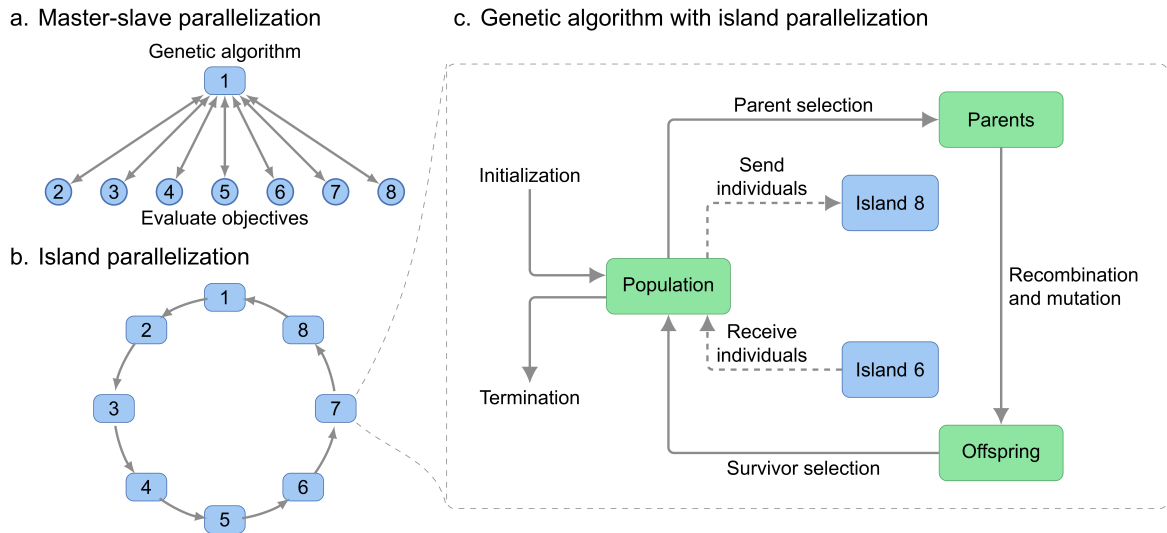



Figure 2: ModCell-HPC benchmark with 161 products. (a) and (e) Coverage is the fraction of Pareto optimal designs captured by a Pareto front approximation (Section 2.7). (b) and (f) Compatible modules indicates the products that appear in at least one design with a design objective above the compatibility threshold, while minimal cover size is the smallest number of designs needed to capture all compatible products (Section 2.6). (c) and (g) Total and unique number of solutions in the Pareto front approximations. (d) and (h) Total number of generations.

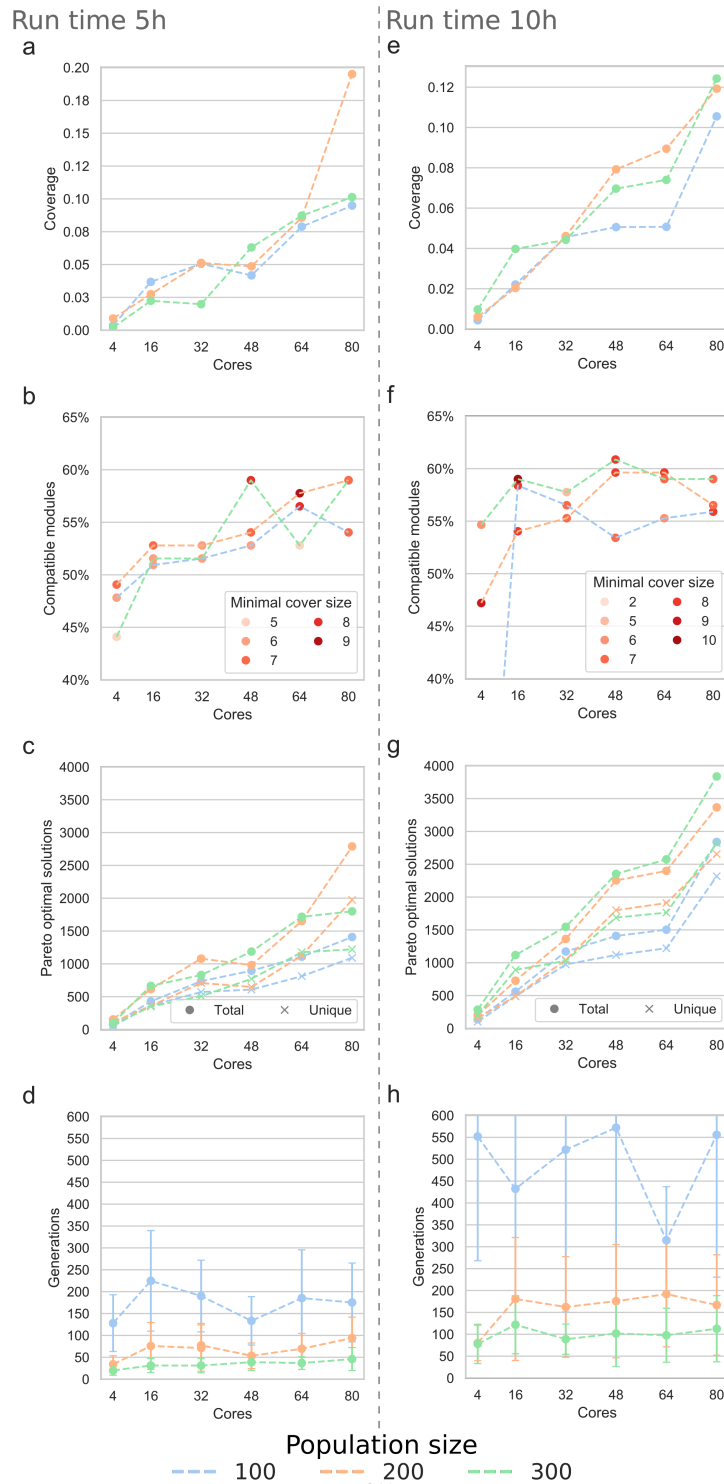

Figure 3: Module reaction usage for design parameters  $\alpha = 5$ ,  $\beta = 1$ . Only designs compatible with the product are considered in the module usage frequency.

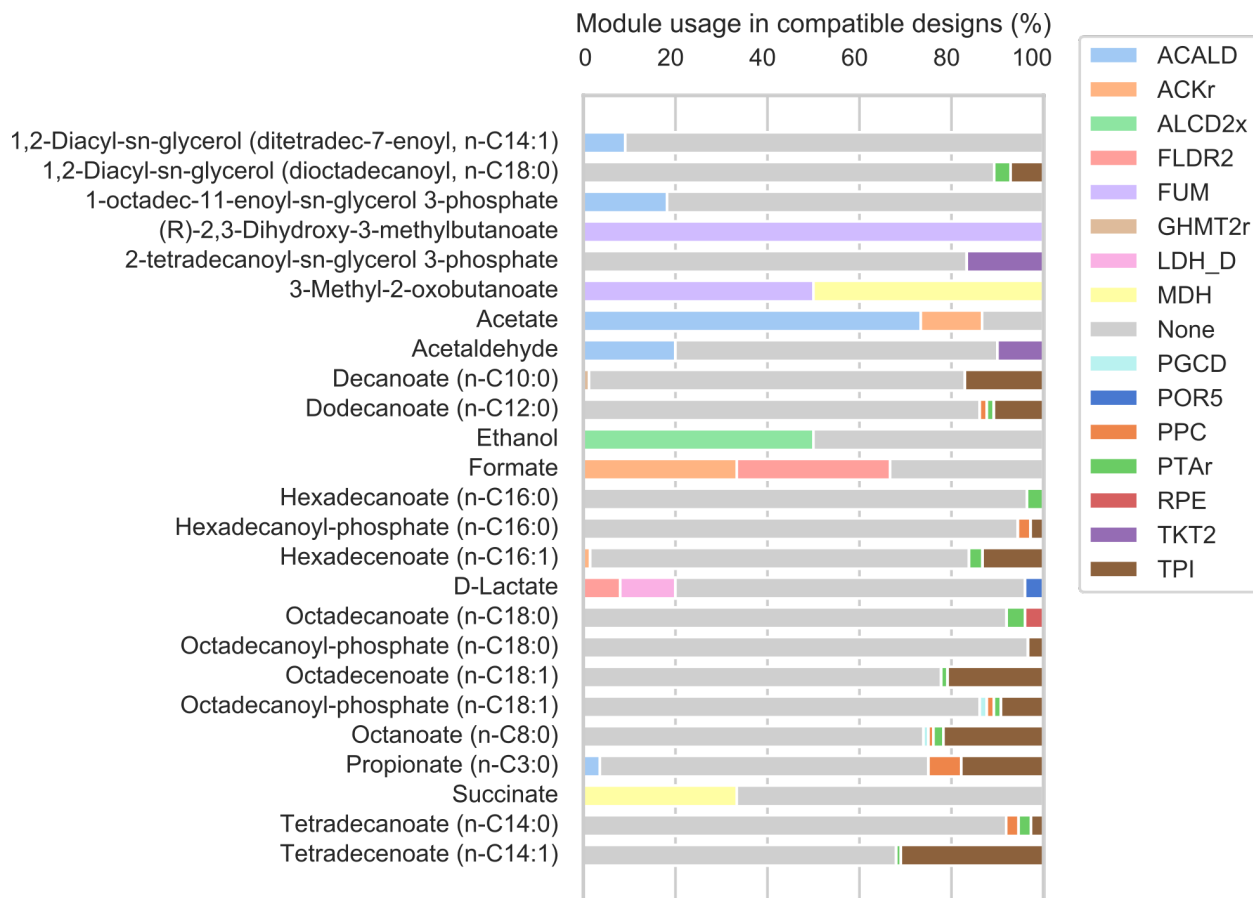

Figure 4: Comparison of the designs in the selected minimal cover. (a) Venn diagram of products compatible with each design. The products uniquely compatible with specific designs are (see <http://bigg.ucsd.edu> for abbreviation descriptions): Design 121: *etoh*, *for*, *23dhmb*; Design 124: *succ*; Design 82: *pg140*, *2hdecg3p*, *2odec11eg3p*, *1agpg180*, *pe140*, *pg161*, *pg141*, *2hdec9eg3p*, *pgp161*, *2agpg180*, *1ddecg3p*, *pg120*, *pgp141*, *pgp140*, *pe141*, *ps140*, *apg120*, *ps120*, *pgp120*, *pe120*, *lipidX*, *2tdecg3p*, *2odecg3p*, *ps141*. (b) Venn diagram of reaction deletions that constitute each design. (c) Metabolic map with reaction deletions colored in red.

a. Compatible modules

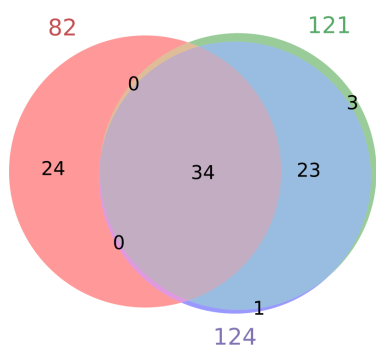

b. Reaction deletions

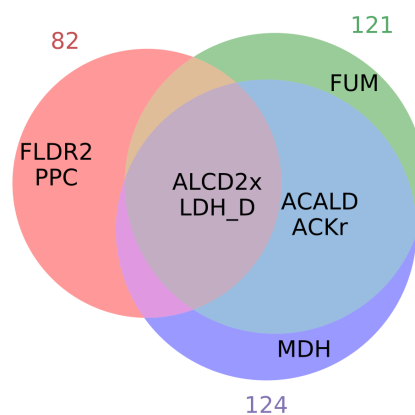

c. Metabolic location of reaction deletions

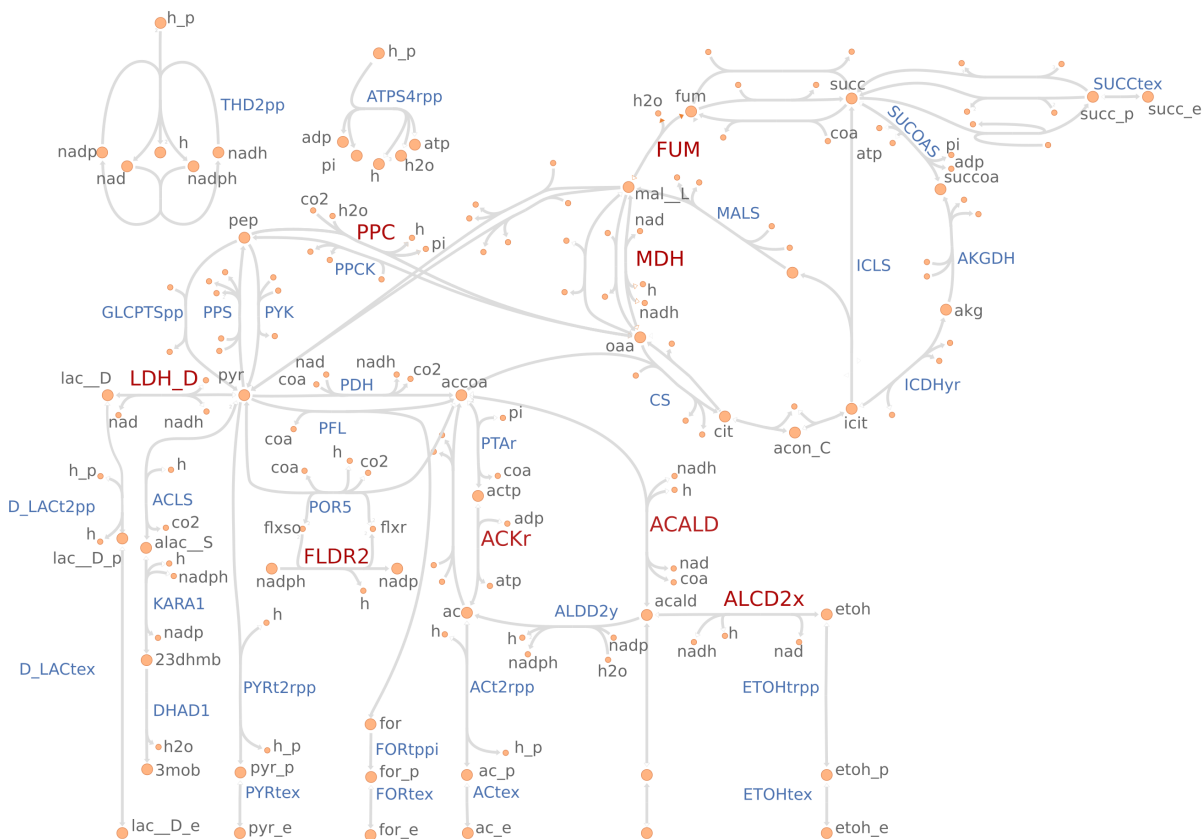

Figure 5: Design of modular cells for different carbon sources with design parameters  $\alpha = 10$ ,  $\beta = 2$ . (a) Sugar uptake, pentose phosphate, Entner-Doudoroff, and upper glycolysis pathways. (b) Venn diagram of total products compatible with designs using pentoses and hexoses. The 26 products uniquely compatible with hexoses are: *1agpg180*, *2tdecg3p*, *2agpg181*, *3c3hmp*, *3mob*, *2hdecg3p*, *pe141*, *ps120*, *1agpg160*, *2agpg160*, *23dhmb*, *ps141*, *1agpe180*, *2agpg180*, *apg120*, *2agpe180*, *pe120*, *2odec11eg3p*, *4mop*, *lipidX*, *3c2hmp*, *2ippm*, *2hdec9eg3p*, *1agpg181*, *dha*, *2odecg3p*. (c) Top 20 reaction deletions according to deletion frequencies average across carbon sources. The counts for each carbon source correspond to the percentage of designs containing that reaction deletion.

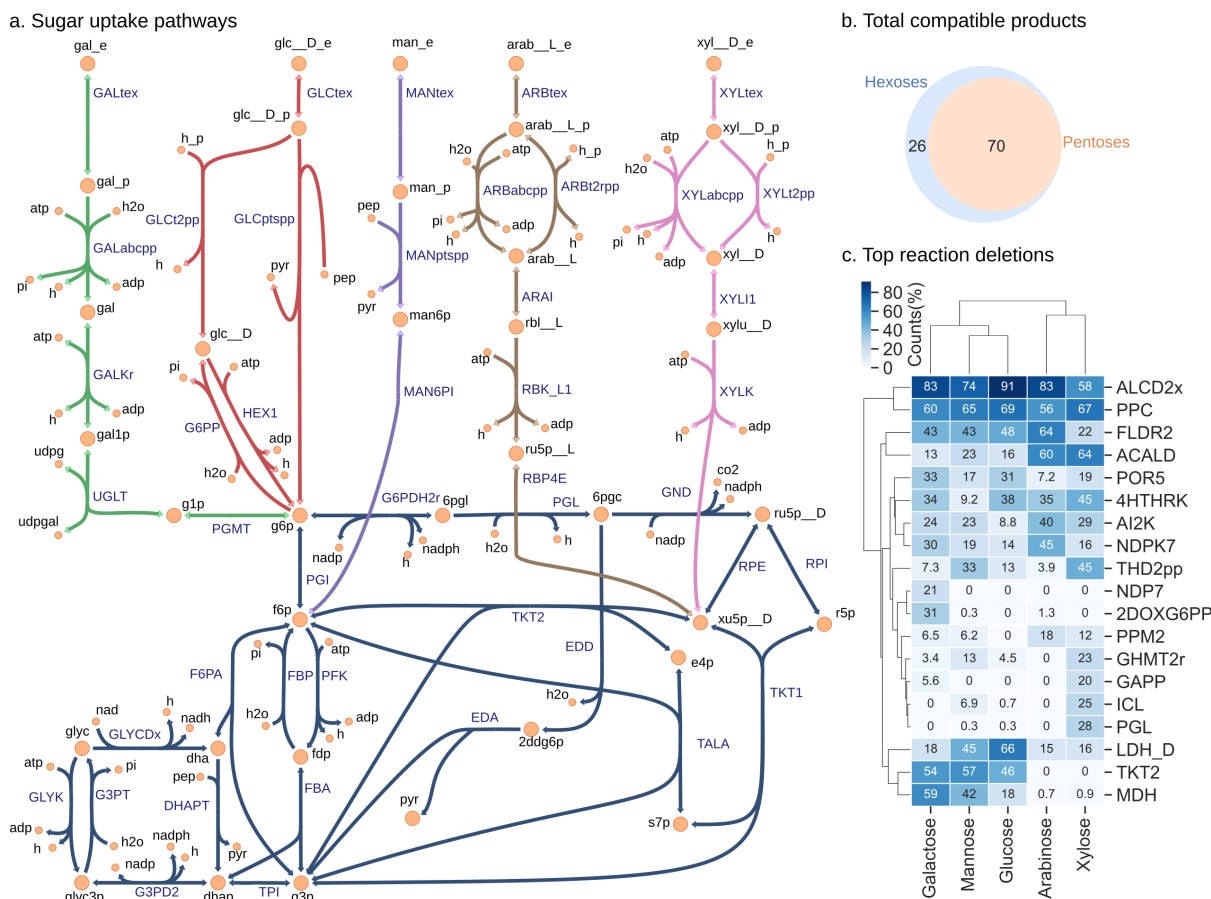

Figure 6: Compatibility towards unknown products in 3 random even partitions of the product library. (a) Distribution of unknown compatibility,  $n$  corresponds to the number of designs in each case. (b-d) Comparison between unknown and known compatibilities of each design for each replicate, where  $r^2$  is the Pearson correlation coefficient.

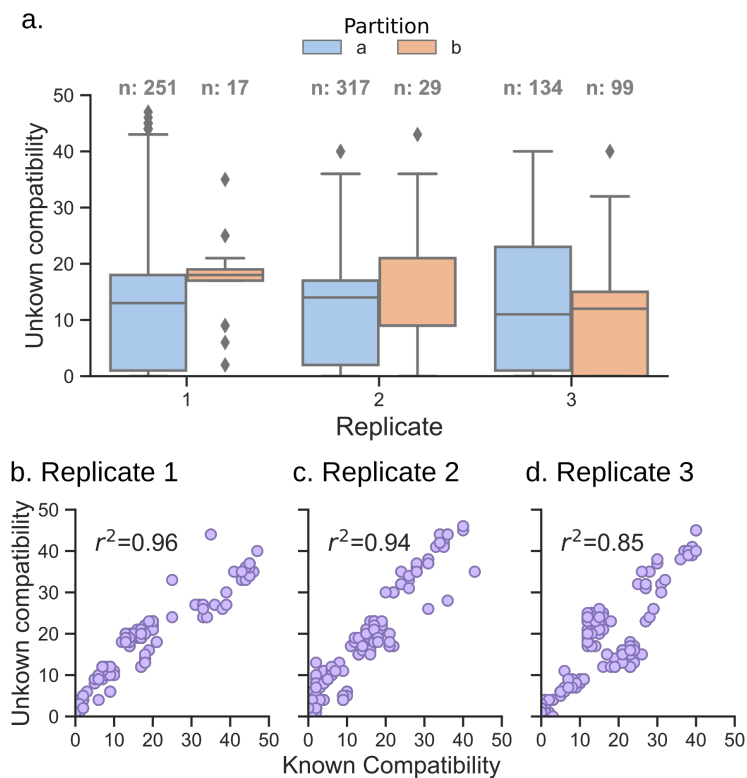

## 418 **Supplementary Materials**

- 419 1. Supplementary Material 1 (SM1): Supplementary figures.
- 420 2. Supplementary Material 2 (SM2): Designs for selected parameters  $\alpha = 5$ ,  $\beta = 1$ .

## 421 References

- 422 1. Garcia, S. & Trinh, C. T. Modular design: Implementing proven engineering principles  
423 in biotechnology. *Biotechnology Advances* **37**, 107403 (2019).
- 424 2. Biggs, B. W., De Paepe, B., Santos, C. N. S., De Mey, M. & Ajikumar, P. K. Multivariate  
425 modular metabolic engineering for pathway and strain optimization. *Current opinion*  
426 *in biotechnology* **29**, 156–162 (2014).
- 427 3. Trinh, C. T., Liu, Y. & Conner, D. J. Rational design of efficient modular cells. *Metabolic*  
428 *engineering* **32**, 220–231 (2015).
- 429 4. Garcia, S. & Trinh, C. T. Multiobjective strain design: A framework for modular cell  
430 engineering. *Metabolic Engineering* **51** (2019).
- 431 5. Garcia, S. & Trinh, C. T. Comparison of Multi-Objective Evolutionary Algorithms to  
432 Solve the Modular Cell Design Problem for Novel Biocatalysis. *Processes* **7** (2019).
- 433 6. Garcia, S. & Trinh, C. T. Harnessing Natural Modularity of Metabolism with Goal  
434 Attainment Optimization to Design a Modular Chassis Cell for Production of Diverse  
435 Chemicals. *ACS Synthetic Biology* **9**. PMID: 32470305, 1665–1681 (2020).
- 436 7. Garcia, S. *et al.* Development of a Genome-Scale Metabolic Model of *Clostridium ther-*  
437 *mocellum* and Its Applications for Integration of Multi-Omics Datasets and Computa-  
438 tional Strain Design. *Frontiers in Bioengineering and Biotechnology* **8**, 772 (2020).
- 439 8. Nielsen, J. & Keasling, J. D. Engineering Cellular Metabolism. *Cell* **164**, 1185–1197  
440 (2016).
- 441 9. Purnick, P. E. M. & Weiss, R. The second wave of synthetic biology: from modules to  
442 systems. *Nature reviews Molecular cell biology* **10**, 410–422 (2009).
- 443 10. Trinh, C. T. & Mendoza, B. Modular cell design for rapid, efficient strain engineering  
444 toward industrialization of biology. *Current Opinion in Chemical Engineering* **14**, 18–  
445 25 (2016).

- 446 11. Lee, S. Y. *et al.* A comprehensive metabolic map for production of bio-based chemicals.  
447 *Nature Catalysis* **2**, 18 (2019).
- 448 12. Layton, D. S. & Trinh, C. T. Engineering modular ester fermentative pathways in  
449 *Escherichia coli*. *Metabolic Engineering* **26**, 77–88 (2014).
- 450 13. Wilbanks, B., Layton, D., Garcia, S. & Trinh, C. A Prototype for Modular Cell Engi-  
451 neering. *ACS Synthetic Biology*, acssynbio.7b00269 (2017).
- 452 14. Hill, M. D. & Marty, M. R. Amdahl’s Law in the Multicore Era. *Computer* **41**, 33–38  
453 (2008).
- 454 15. Ishibuchi, H., Sakane, Y., Tsukamoto, N. & Nojima, Y. *Evolutionary many-objective*  
455 *optimization by NSGA-II and MOEA/D with large populations in IEEE International*  
456 *Conference on Systems, Man and Cybernetics* (2009), 1758–1763.
- 457 16. Deb, K., Pratap, A., Agarwal, S. & Meyarivan, T. A fast and elitist multiobjective  
458 genetic algorithm: NSGA-II. *IEEE transactions on evolutionary computation* **6**, 182–  
459 197 (2002).
- 460 17. Ishibuchi, H., Tsukamoto, N. & Nojima, Y. *Evolutionary many-objective optimization:*  
461 *A short review in 2008 IEEE Congress on Evolutionary Computation (IEEE World*  
462 *Congress on Computational Intelligence)* (2008), 2419–2426.
- 463 18. Li, K., Wang, R., Zhang, T. & Ishibuchi, H. Evolutionary Many-Objective Optimiza-  
464 tion: A Comparative Study of the State-of-the-Art. *IEEE Access* **6**, 26194–26214 (2018).
- 465 19. Alba, E., Luque, G. & Nasmachnow, S. Parallel metaheuristics: recent advances and  
466 new trends. *International Transactions in Operational Research* **20**, 1–48 (2013).
- 467 20. Märtens, M. & Izzo, D. *The asynchronous island model and NSGA-II: study of a new*  
468 *migration operator and its performance in Proceedings of the 15th annual conference*  
469 *on Genetic and evolutionary computation* (2013), 1173–1180.



- 470 21. Jozefowicz, N., Semet, F. & Talbi, E.-G. *Enhancements of NSGA II and its applica-*  
471 *tion to the vehicle routing problem with route balancing in International Conference on*  
472 *Artificial Evolution (Evolution Artificielle)* (2005), 131–142.
- 473 22. García-Sánchez, P., Ortega, J., González, J., Castillo, P. A. & Merelo, J. J. *Addressing*  
474 *high dimensional multi-objective optimization problems by coevolutionary islands with*  
475 *overlapping search spaces in European Conference on the Applications of Evolutionary*  
476 *Computation* (2016), 107–117.
- 477 23. Brodeur, G. *et al.* Chemical and physicochemical pretreatment of lignocellulosic biomass:  
478 a review. *Enzyme research* **2011** (2011).
- 479 24. Palsson, B. Ø. *Systems biology: constraint-based reconstruction and analysis* (Cam-  
480 bridge University Press, United Kingdom, 2015).
- 481 25. Von Kamp, A. & Klamt, S. Growth-coupled overproduction is feasible for almost  
482 all metabolites in five major production organisms. *Nature communications* **8**, 15956  
483 (2017).
- 484 26. Monk, J. M. *et al.* iML1515, a knowledgebase that computes Escherichia coli traits.  
485 *Nature biotechnology* **35**, 904 (2017).
- 486 27. Hijaze, M. & Corne, D. *An investigation of topologies and migration schemes for asyn-*  
487 *chronous distributed evolutionary algorithms in 2009 World Congress on Nature &*  
488 *Biologically Inspired Computing (NaBIC)* (2009), 636–641.
- 489 28. Winkler, J. D., Halweg-Edwards, A. L. & Gill, R. T. The LASER database: Formalizing  
490 design rules for metabolic engineering. *Metabolic Engineering Communications* **2**, 30–  
491 38 (2015).
- 492 29. Tokuyama, K. *et al.* Increased 3-hydroxypropionic acid production from glycerol, by  
493 modification of central metabolism in Escherichia coli. *Microbial cell factories* **13**, 64  
494 (2014).

- 495 30. Venayak, N., von Kamp, A., Klamt, S. & Mahadevan, R. MoVE identifies metabolic  
496 valves to switch between phenotypic states. *Nature communications* **9**, 5332 (2018).
- 497 31. Chemler, J. A., Fowler, Z. L., McHugh, K. P. & Koffas, M. A. Improving NADPH  
498 availability for natural product biosynthesis in *Escherichia coli* by metabolic engineer-  
499 ing. *Metabolic Engineering* **12**. Metabolic Flux Analysis for Pharmaceutical Production  
500 Special Issue, 96–104 (2010).
- 501 32. Stephanopoulos, G. & Vallino, J. J. Network rigidity and metabolic engineering in  
502 metabolite overproduction. *Science* **252**, 1675–1681 (1991).
- 503 33. Fong, S. S., Nanchen, A., Palsson, B. O. & Sauer, U. Latent pathway activation and  
504 increased pathway capacity enable *Escherichia coli* adaptation to loss of key metabolic  
505 enzymes. *Journal of Biological Chemistry* **281**, 8024–8033 (2006).
- 506 34. Boecker, S., Zahoor, A., Schramm, T., Link, H. & Klamt, S. Broadening the scope of en-  
507 forced atp wasting as a tool for metabolic engineering in *Escherichia coli*. *Biotechnology*  
508 *journal* **14**, 1800438 (2019).
- 509 35. De Maeseneire, S., De Mey, M., Vandedrinc, S. & Vandamme, E. Metabolic charac-  
510 terisation of *E. coli* citrate synthase and phosphoenolpyruvate carboxylase mutants in  
511 aerobic cultures. *Biotechnology letters* **28**, 1945–1953 (2006).
- 512 36. Peng, L., Arauzo-Bravo, M. J. & Shimizu, K. Metabolic flux analysis for a ppc mutant  
513 *Escherichia coli* based on <sup>13</sup>C-labelling experiments together with enzyme activity as-  
514 says and intracellular metabolite measurements. *FEMS Microbiology Letters* **235**, 17–  
515 23 (2004).
- 516 37. Atsumi, S., Hanai, T. & Liao, J. C. Non-fermentative pathways for synthesis of branched-  
517 chain higher alcohols as biofuels. *Nature* **451**, 86 (2008).
- 518 38. Atsumi, S. *et al.* Engineering the isobutanol biosynthetic pathway in *Escherichia coli*  
519 by comparison of three aldehyde reductase/alcohol dehydrogenase genes. *Applied mi-  
520 crobiology and biotechnology* **85**, 651–657 (2010).

- 521 39. Park, S.-J., Cotter, P. A. & Gunsalus, R. P. Regulation of malate dehydrogenase (mdh)  
522 gene expression in *Escherichia coli* in response to oxygen, carbon, and heme availability.  
523 *Journal of bacteriology* **177**, 6652–6656 (1995).
- 524 40. Christodoulou, D. *et al.* Reserve flux capacity in the pentose phosphate pathway enables  
525 *Escherichia coli*'s rapid response to oxidative stress. *Cell systems* **6**, 569–578 (2018).
- 526 41. Lee, W.-H., Kim, M.-D., Jin, Y.-S. & Seo, J.-H. Engineering of NADPH regenerators in  
527 *Escherichia coli* for enhanced biotransformation. *Applied microbiology and biotechnology*  
528 **97**, 2761–2772 (2013).
- 529 42. Ng, C. Y., Farasat, I., Maranas, C. D. & Salis, H. M. Rational design of a syn-  
530 thetic Entner–Doudoroff pathway for improved and controllable NADPH regeneration.  
531 *Metabolic engineering* **29**, 86–96 (2015).
- 532 43. Dragosits, M. & Mattanovich, D. Adaptive laboratory evolution—principles and appli-  
533 cations for biotechnology. *Microbial cell factories* **12**, 64 (2013).
